# Supplementary material for: Pediatric Cystic Fibrosis Sputum Can Be Chemically Dynamic, Anoxic, and Extremely Reduced Due to Hydrogen Sulfide Formation
Source: PubMed Central journal article supplement — mBio. 2015 Jul 28;6(4):e00767-15. doi: 10.1128/mBio.00767-15 (PMC4551978; doi:10.1128/mbio.00767-15), 2015-07-28
Supplement: mbo004152404st1.pdf [file mbo004152404st1.pdf]

| #  | Sample date | CFRD | IgE  | OW | OS | IP | PEX | IV | Home IV | Supp O <sub>2</sub> | O <sub>2</sub> (L/min) | Sp O <sub>2</sub> (%) | <i>B. cepacia</i> | <i>P. aeruginosa</i> | <i>S. aureus</i> | S-type | <i>A. fumigatus</i> | <i>S. maltophilia</i>                                  | Other microbes | FVC% | FEV1% | FEV1/FVC% | FEF25-75% | RV% | TLC% | RV/TLC% | Disease Severity Based on FEV1%     | Types of Profiles Completed                                       | Total Depth of Sputum Sample (mm) | Oxygen Profile Characteristics   | Reduction Potential Class | Lowest Reduction Potential Value (mV)                        | Maximum Reduction Potential Value (mV) | Presence of H <sub>2</sub> S? | Highest Concentration of H <sub>2</sub> S Recorded (uM) | Highest pH Recorded | Lowest pH Recorded | Presence of N <sub>2</sub> O? | Highest Concentration of N <sub>2</sub> O Recorded (uM) |     |  |
|----|-------------|------|------|----|----|----|-----|----|---------|---------------------|------------------------|-----------------------|-------------------|----------------------|------------------|--------|---------------------|--------------------------------------------------------|----------------|------|-------|-----------|-----------|-----|------|---------|-------------------------------------|-------------------------------------------------------------------|-----------------------------------|----------------------------------|---------------------------|--------------------------------------------------------------|----------------------------------------|-------------------------------|---------------------------------------------------------|---------------------|--------------------|-------------------------------|---------------------------------------------------------|-----|--|
|    |             |      |      |    |    |    |     |    |         |                     |                        |                       |                   |                      |                  |        |                     |                                                        |                |      |       |           |           |     |      |         |                                     |                                                                   |                                   |                                  |                           |                                                              |                                        |                               |                                                         |                     |                    |                               |                                                         |     |  |
| 2  | 8/6/2014    | 1    | -    | 1  | 0  | 0  | N   | Y  | Y       | Y                   | 2                      | 97                    | 0                 | 1                    | 0                | 0      | 1                   | 0                                                      |                | 22   | 19    | 77        | 12        | -   | -    | -       | Severe                              | Oxygen, Redox, H <sub>2</sub> S                                   | -                                 | Oxycline followed by anoxic zone | Oxidized                  | -                                                            | -                                      | No                            | 0.00                                                    | N/A                 | N/A                | N/A                           | N/A                                                     |     |  |
| 5  | 4/15/2013   | 0    |      | 1  | 0  | 0  | N   |    |         |                     |                        |                       |                   |                      |                  |        |                     |                                                        |                | 57   | 36    | 55        | 12        | 332 | 117  | 61      | Severe                              | Oxygen                                                            | 11                                | Oxycline followed by anoxic zone |                           | N/A                                                          | N/A                                    | N/A                           |                                                         |                     | N/A                | N/A                           |                                                         |     |  |
| 5  | 5/14/2013   | 0    |      | 0  | 0  | 1  | Y   | Y  |         | N                   |                        | 96                    |                   |                      |                  |        |                     |                                                        |                | 69   | 48    | 60        | 18        | 462 | 152  | 65      | Moderate                            | Oxygen                                                            | -                                 | Oxycline followed by anoxic zone |                           | N/A                                                          | N/A                                    | N/A                           |                                                         |                     | N/A                | N/A                           |                                                         |     |  |
| 6  | 10/28/2013  | 1    |      | 1  | 0  | 0  | N   |    |         |                     |                        |                       |                   |                      |                  |        |                     |                                                        |                | 39   | 20    | 44        | 6         | 313 | 105  | 63      | Severe                              | Oxygen, Redox                                                     | -                                 | Oxycline followed by anoxic zone | Oxidized                  | 59.20                                                        | 378.68                                 | N/A                           |                                                         |                     | N/A                | N/A                           |                                                         |     |  |
| 6  | 11/25/2013  | 1    |      | 1  | 0  | 0  | N   | N  |         | Y                   | 2                      | 97                    | 0                 | 1                    | 1                | 0      | 0                   | 0 yeast                                                |                | 45   | 20    | 40        | 4         | 310 | 110  | 59      | Severe                              | Oxygen, Redox                                                     | 10.6                              | Oxycline followed by anoxic zone |                           | Not quite sure if the redox profiles are useable in this run |                                        | N/A                           |                                                         |                     | N/A                | N/A                           |                                                         |     |  |
| 6  | 8/13/2014   | 1    | -    | 1  | 0  | 0  | N   | N  | N       | Y                   | 2                      | 96                    | -                 | -                    | -                | -      | -                   | -                                                      |                | -    | -     | -         | -         | -   | -    |         | Oxygen, Redox, and H <sub>2</sub> S | 5.5                                                               | Oxycline followed by anoxic zone  | Oxidized                         | 355.19                    | 426.15                                                       | No                                     | 0.00                          | N/A                                                     | N/A                 | N/A                | N/A                           |                                                         |     |  |
| 9  | 8/12/2013   | 0    | 37   | 0  | 0  | 1  | Y   | Y  |         | Y                   | 1                      | 97                    | 0                 | 1                    | 0                |        | 0                   |                                                        |                | 58   | 47    | 73        | 25        | 158 | 78   | 43      | Moderate                            | Oxygen                                                            | 22                                | Oxycline followed by anoxic zone |                           | N/A                                                          | N/A                                    | N/A                           |                                                         |                     | N/A                | N/A                           |                                                         |     |  |
| 9  | 9/18/2013   | 0    |      | 1  | 0  | 0  | N   | N  |         | N                   |                        |                       | 0                 | 1                    | 0                |        | 0                   |                                                        |                | 57   | 47    | 74        | 26        | 183 | 83   | 47      | Moderate                            | Oxygen, Redox                                                     | 16                                | Oxycline followed by anoxic zone | Reduced                   | -234.29                                                      | 395.48                                 | N/A                           |                                                         |                     | N/A                | N/A                           |                                                         |     |  |
| 9  | 5/12/2014   | 0    | -    | 1  | 0  | 0  | N   | N  | N       | N                   |                        | 98                    | 0                 | 1                    | 0                |        | 0                   | nontuberculosis mycobacteria                           |                | 54   | 43    | 71        | 22        | 175 | 81   | 45      | Moderate                            | Oxygen, Redox, H <sub>2</sub> S, pH                               | 11.15                             | Oxycline followed by anoxic zone | Reduced                   | -198.47                                                      | 347.92                                 | Yes                           | 96.23                                                   | 5.96                | 4.30               | N/A                           | N/A                                                     |     |  |
| 10 | 5/5/2014    | 1    |      | 0  | 0  | 1  | Y   | N  | N       | N                   |                        | 98                    | 0                 | 0                    | 1                | 0      | 0                   |                                                        |                | 68   | 44    | 57        | 20        | 249 | 123  | 43      | Moderate                            | Oxygen, H <sub>2</sub> S                                          | 5.6                               | Oxycline followed by anoxic zone | Oxidized                  | N/A                                                          | N/A                                    | No                            | 0.00                                                    | N/A                 | N/A                | N/A                           | N/A                                                     |     |  |
| 10 | 7/21/2014   | 1    | -    | 1  | 0  | 0  | N   | N  | N       | N                   |                        | 96                    | 0                 | 0                    | 1                | 0      | 0                   |                                                        |                | 61   | 45    | 65        | 23        | 351 | 138  | 54      | Moderate                            | Oxygen, Redox                                                     | 10.85                             | Oxycline followed by anoxic zone | Oxidized                  | 74.46                                                        | 322.22                                 | N/A                           | N/A                                                     | N/A                 | N/A                | N/A                           | N/A                                                     |     |  |
| 10 | 8/6/2014    | 1    | 711  | 0  | 1  | 0  | Y   | N  | N       | N                   |                        | 95                    | 0                 | 0                    | 1                | 0      | 0                   |                                                        |                | 64   | 47    | 64        | 25        | 351 | 141  | 53      | Moderate                            | Oxygen, Redox, H <sub>2</sub> S, pH                               | 23.1                              | Oxycline followed by anoxic zone | Oxidized                  | 186.87                                                       | 398.00                                 | Yes                           | 135.09                                                  | 4.67                | 2.91               | N/A                           | N/A                                                     |     |  |
| 10 | 9/17/2014   | 1    | -    | 0  | 0  | 1  | Y   | Y  | N       | N                   |                        | 96                    |                   |                      |                  |        |                     |                                                        |                | 67   | 50    | 66        | 28        | 223 | 120  | 40      | Moderate                            | Oxygen, Redox, H <sub>2</sub> S, N <sub>2</sub> O                 | 17.3                              | Oxycline followed by anoxic zone | Oxidized                  | 76.20                                                        | 296.46                                 | No                            | 0.00                                                    | N/A                 | N/A                | No                            | 0.00                                                    |     |  |
| 11 | 10/2/2013   | 0    | 50   | 1  | 0  | 0  | N   |    |         | N                   |                        | 97                    | 0                 | 1                    | 0                |        | 1                   | <i>Bacillus</i>                                        |                | 114  | 105   | 81        | 92        | 99  | 105  | 20      | Normal to Mild                      | Control experiments with anoxic solutions                         | -                                 | Oxycline followed by anoxic zone |                           |                                                              |                                        | N/A                           |                                                         |                     | N/A                | N/A                           |                                                         |     |  |
| 16 | 1/3/2013    | 0    |      | 0  | 0  | 1  | Y   | Y  |         | Y                   | 1                      | 95                    |                   |                      |                  |        |                     |                                                        |                | 72   | 33    | 38        | 9         | 391 | 154  | 53      | Severe                              | Microelectrode Demo                                               | -                                 | Oxycline followed by anoxic zone |                           |                                                              |                                        | N/A                           |                                                         |                     | N/A                | N/A                           |                                                         |     |  |
| 19 | 5/21/2013   | 1    |      | 0  | 0  | 1  | Y   | Y  |         | Y                   | 2.5                    | 100                   |                   |                      |                  |        |                     |                                                        |                | 60   | 32    | 48        | 9         | 413 | 132  | 64      | Severe                              | Oxygen                                                            | 8.8                               | Oxycline followed by anoxic zone |                           | N/A                                                          | N/A                                    | N/A                           | N/A                                                     | N/A                 | N/A                | N/A                           |                                                         |     |  |
| 19 | 4/21/2014   | 1    |      | 0  | 0  | 1  | Y   | Y  |         | Y                   | 1                      | 95                    |                   |                      |                  |        |                     |                                                        |                | 63   | 34    | 53        | 13        | 206 | 92   | 45      | Severe                              | Oxygen, Redox, H <sub>2</sub> S                                   | 7.75                              | Oxycline followed by anoxic zone | Oxidized                  | 213.77                                                       | 357.08                                 | No                            | 0.00                                                    | N/A                 | N/A                | N/A                           | N/A                                                     |     |  |
| 19 | 9/10/2014   | 1    |      | 0  | 0  | 1  | Y   | Y  |         | Y                   | 2                      | 98                    |                   |                      |                  |        |                     |                                                        |                | 62   | 38    | 56        | 13        | 279 | 108  | 52      | Severe                              | Oxygen, Redox, H <sub>2</sub> S                                   | 5.05                              | Oxycline followed by anoxic zone | Oxidized                  | 382.70                                                       | 408.56                                 | No                            |                                                         |                     |                    | N/A                           | N/A                                                     |     |  |
| 22 | 7/28/2014   | 0    | -    | 1  | 0  | 0  | N   | N  | N       | N                   |                        | 97                    | 0                 | 1                    | 0                | 0      | 0                   |                                                        |                | 85   | 54    | 54        | 19        | 264 | 130  | 42      | Moderate                            | Oxygen, Redox, pH, H <sub>2</sub> S                               | 11                                | Oxycline followed by anoxic zone | Reduced                   | -422.16                                                      | 379.76                                 | Yes                           | 146.29                                                  | 7.39                | 5.38               | N/A                           | N/A                                                     |     |  |
| 24 | 9/10/2014   | 1    | -    | 1  | 0  | 0  | N   | N  | N       | N                   |                        | 100                   |                   |                      |                  |        |                     |                                                        |                | 88   | 87    | 89        | 129       | 208 | 114  | 37      | Normal to Mild                      | Oxygen, Redox, H <sub>2</sub> S                                   | 1.475                             | Oxycline followed by anoxic zone | Oxidized                  | 569.15                                                       | 619.28                                 | No                            | 0.00                                                    |                     |                    | N/A                           | N/A                                                     |     |  |
| 27 | 4/4/2013    | 1    | 138  | 0  | 0  | 1  | Y   | Y  |         | N                   |                        | 99                    |                   |                      |                  |        |                     |                                                        |                | 78   | 65    | 73        | 43        | 277 | 122  | 50      | Moderate                            | Oxygen Control Experiments with anoxic solution for oxygen sensor | 3                                 | Oxycline followed by anoxic zone |                           | N/A                                                          | N/A                                    | N/A                           | N/A                                                     | N/A                 | N/A                | N/A                           |                                                         |     |  |
| 27 | 10/9/2013   | 1    | 84   | 0  | 0  | 1  | Y   | Y  |         | N                   |                        | 98                    | 0                 | 1                    | 1                | 1      | 0                   | 0 <i>Candida</i>                                       |                | 82   | 67    | 71        | 38        | 190 | 105  | 40      | Moderate                            | Oxygen                                                            | -                                 | Oxycline followed by anoxic zone |                           | N/A                                                          | N/A                                    | Not measured                  | N/A                                                     | N/A                 | N/A                | N/A                           |                                                         |     |  |
| 28 | 4/23/2013   |      | 4754 |    | 0  |    |     |    |         |                     |                        |                       | 0                 | 0                    | 1                | 0      | 0                   | 0 <i>Achromobacter xylosoxidans, acid-fast bacilli</i> |                | 116  | 116   | 90        | 133       | 275 | 148  | 39      | Normal to Mild                      | Oxygen                                                            | 12                                | Oxycline followed by anoxic zone |                           | N/A                                                          | N/A                                    | N/A                           | N/A                                                     | N/A                 | N/A                | N/A                           |                                                         |     |  |
| 28 | 11/20/2013  |      |      | 0  | 0  | 1  | Y   | Y  |         | N                   |                        | 97                    | 0                 | 0                    | 1                | 0      | 0                   |                                                        |                | 88   | 81    | 83        | 70        | 207 | 116  | 37      | Normal to Mild                      | Oxygen, Redox                                                     | 11.6                              | Oxycline followed by anoxic zone | Reduced                   | -220.71                                                      | 124.68                                 | N/A                           | N/A                                                     | N/A                 | N/A                | N/A                           | N/A                                                     |     |  |
| 29 | 6/16/2014   | 0    |      | 0  | 1  | 0  | Y   | N  | N       | N                   |                        | 97                    | 0                 | 1                    | 1                | 0      | 0                   |                                                        |                | 94   | 75    | 71        | 37        | 228 | 117  | 40      | Normal to Mild                      | Oxygen, Redox, H <sub>2</sub> S                                   | 5.85                              | Oxycline followed by anoxic zone | Oxidized                  | 44.52                                                        | 379.55                                 | No                            | 0.00                                                    | N/A                 | N/A                | N/A                           | N/A                                                     |     |  |
| 30 | 2/17/2014   | 0    |      | 1  | 0  | 0  | N   | N  |         | N                   |                        | 100                   |                   |                      |                  |        |                     |                                                        |                | 97   | 85    | 75        | 59        | 146 | 105  | 30      | Normal to Mild                      | Oxygen and Redox                                                  | 11.5                              | Oxycline followed by anoxic zone | Reduced                   | -300.39                                                      | 341.20                                 | N/A                           | N/A                                                     | N/A                 | N/A                | N/A                           | N/A                                                     |     |  |
| 30 | 8/11/2014   | 0    | -    | 1  | 0  | 0  | N   | N  | N       | N                   |                        | 97                    | 0                 | 0                    | 1                | 0      | 0                   |                                                        |                | 107  | 101   | 97        | 97        | 145 | 112  | 27      | Normal to Mild                      | Oxygen, Redox, H <sub>2</sub> S, N <sub>2</sub> O                 | 18.6                              | Oxycline followed by anoxic zone | Oxidized                  | 62.67                                                        | 222.08                                 | Yes                           | 72.27                                                   | N/A                 | N/A                | Yes                           | 21.83                                                   |     |  |
| 31 | 10/28/2013  | 1    |      | 1  | 0  | 0  | N   |    |         | N                   |                        | 99                    | 0                 | 1                    | 0                |        | 0                   |                                                        |                | 75   | 68    | 81        | 59        | 182 | 96   | 41      | Moderate                            | Oxygen, pH                                                        | 8                                 | Oxycline followed by anoxic zone |                           | N/A                                                          | N/A                                    | N/A                           | N/A                                                     | N/A                 | 6.84               | 5.35                          | N/A                                                     | N/A |  |
| 31 | 6/18/2014   | 1    |      | 0  | 1  | 0  | Y   | N  | N       | N                   |                        | 96                    | 0                 | 1                    | 1                | 0      | 0                   |                                                        |                | 67   | 52    | 69        | 16        | 190 | 92   | 45      | Moderate                            | Oxygen, Redox, H <sub>2</sub> S                                   | 5.95                              | Oxycline followed by anoxic zone | Oxidized                  | 15.78                                                        | 262.88                                 | No                            | 0.00                                                    | N/A                 | N/A                | N/A                           | N/A                                                     |     |  |
| 31 | 8/4/2014    | 1    | -    | 1  | 0  | 0  | N   | N  | N       | N                   |                        | 95                    | 0                 | 1                    | 0                | 0      | 0                   |                                                        |                | 69   | 58    | 75        | 28        | 162 | 88   | 40      | Moderate                            | Oxygen, Redox, H <sub>2</sub> S                                   | -                                 | Oxycline followed by anoxic zone | Reduced                   | -                                                            | -                                      | Yes                           | -                                                       | N/A                 | N/A                | N/A                           | N/A                                                     |     |  |
| 32 | 7/30/2014   | 0    | 32   | 1  | 0  | 0  | N   | N  | N       | N                   |                        | 98                    | 0                 | 0                    | 0                |        | 0                   | 0 <i>Scedosporium apiospermum</i>                      |                | 66   | 59    | 78        | 48        | 182 | 93   | 40      | Moderate                            | Oxygen, Redox, H <sub>2</sub> S, pH                               | 3.25                              | Oxycline followed by anoxic zone | Reduced                   | -107.11                                                      | 277.27                                 | Yes                           | 4.78                                                    | 6.51                | 5.43               | N/A                           | N/A                                                     |     |  |
| 32 | 10/1/2014   | 0    |      | 1  | 0  | 0  | N   | N  | N       | N                   |                        | 98                    | 0                 | 0                    | 0                |        | 0                   | 1                                                      |                | 57   | 51    | 77        | 40        | 97  | 68   | 30      | Moderate                            | Oxygen, Redox, H <sub>2</sub> S                                   | 5.3                               | Oxycline followed by anoxic zone | Oxidized                  | 212.16                                                       | 229.05                                 | No                            | 0.00                                                    |                     |                    |                               |                                                         |     |  |
| 34 | 5/16/2013   | 0    |      | 0  | 0  | 1  | Y   | Y  |         | N                   |                        | 99                    |                   |                      |                  |        |                     |                                                        |                | 83   | 78    | 80        | 70        | 124 | 99   | 26      | Normal to Mild                      | Oxygen                                                            | 20                                | Oxycline followed by anoxic zone |                           | N/A                                                          | N/A                                    | N/A                           |                                                         |                     |                    | N/A                           | N/A                                                     |     |  |
| 34 | 7/29/2013   | 0    |      | 1  | Y  |    |     |    |         |                     |                        |                       | 0                 | 0                    | 1                | 0      | 0                   | 0 <i>Achromobacter</i>                                 |                | 72   | 58    | 70        | 34        | 192 | 103  | 38      | Moderate                            | Oxygen                                                            | 31                                | Oxycline followed by anoxic zone |                           | N/A                                                          | N/A                                    | N/A                           |                                                         |                     |                    | N/A                           | N/A                                                     |     |  |

| #  | Sample date | CFRD | IgE | OW | OS | IP | PEx | IV | Home IV | Supp O <sub>2</sub> | O <sub>2</sub> (L/min) | Sp O <sub>2</sub> (%) | B. cepacia | P. aeruginosa | S. aureus | S-type | A. fumigatus | S. maltophilia | Other microbes             | FVC% | FEV1% | FEV1/FVC% | FEF25-75% | RV% | TLC% | RV/TLC% | Disease Severity Based on FEV1% | Types of Profiles Completed | Total Depth of Sputum Sample (mm)   | Oxygen Profile Characteristics   | Reduction Potential Class        | Lowest Reduction Potential Value (mV) | Maximum Reduction Potential Value (mV) | Presence of H <sub>2</sub> S? | Highest Concentration of H <sub>2</sub> S Recorded (uM) | Highest pH Recorded | Lowest pH Recorded | Presence of N <sub>2</sub> O? | Highest Concentration of N <sub>2</sub> O Recorded (uM) |     |     |
|----|-------------|------|-----|----|----|----|-----|----|---------|---------------------|------------------------|-----------------------|------------|---------------|-----------|--------|--------------|----------------|----------------------------|------|-------|-----------|-----------|-----|------|---------|---------------------------------|-----------------------------|-------------------------------------|----------------------------------|----------------------------------|---------------------------------------|----------------------------------------|-------------------------------|---------------------------------------------------------|---------------------|--------------------|-------------------------------|---------------------------------------------------------|-----|-----|
| 34 | 7/31/2013   | 0    |     | 0  | 0  | 1  | Y   | Y  |         | N                   |                        | 98                    |            |               |           |        |              |                |                            |      |       |           |           |     |      |         | NA                              | Oxygen and pH               | 20                                  | Oxycline followed by anoxic zone |                                  | N/A                                   | N/A                                    | N/A                           |                                                         | 9.09                | 8.42               | N/A                           | N/A                                                     |     |     |
| 34 | 8/6/2013    | 0    |     | 0  | 0  | 1  | Y   | Y  |         | N                   |                        | 97                    |            |               |           |        |              |                |                            |      | 78    | 68        | 75        | 49  | 163  | 103     | 32                              | Moderate                    | Oxygen                              | -                                | Oxycline followed by anoxic zone |                                       | N/A                                    | N/A                           | N/A                                                     |                     | N/A                | N/A                           | N/A                                                     | N/A |     |
| 36 | 3/12/2014   | 0    |     | 1  | 0  | 0  | N   |    |         | N                   |                        | 99                    | 0          | 0             | 1         | 1      | 0            | 0              |                            |      | 86    | 77        | 76        | 54  | 137  | 95      | 31                              | Normal to Mild              | Oxygen, N <sub>2</sub> O            |                                  | Oxycline followed by anoxic zone |                                       | N/A                                    | N/A                           | N/A                                                     |                     | N/A                | N/A                           | No                                                      | N/A |     |
| 36 | 6/18/2014   | 0    |     | 1  | 0  | 0  | N   | N  | N       | N                   |                        | 98                    | 0          | 0             | 1         | 1      | 0            | 0              |                            |      | 82    | 71        | 74        | 47  | 128  | 89      | 30                              | Normal to Mild              | Oxygen, Redox, H <sub>2</sub> S, pH | 11.5                             | Oxycline followed by anoxic zone | Reduced                               | -169.42                                | 247.88                        | Yes                                                     | 87.45               | 8.23               | 3.28                          | N/A                                                     | N/A |     |
| 36 | 7/21/2014   | 0    | -   | 1  | 0  | 0  | N   | N  | N       | N                   |                        | 100                   | 0          | 0             | 1         | 1      | 0            | 0              | <i>Mycobacterium avium</i> |      | 88    | 84        | 81        | 87  | 141  | 96      | 31                              | Normal to Mild              | Oxygen, Redox, H <sub>2</sub> S     |                                  | Oxycline followed by anoxic zone | Reduced                               | -200.76                                | 76.09                         | No                                                      | 0.00                | N/A                | N/A                           | N/A                                                     | N/A |     |
| 37 | 12/9/2013   | 0    | 108 | 0  | 1  | 0  | N   | N  | N       | N                   |                        | 100                   | 0          | 1             | 1         | 0      | 0            | 0              |                            |      | 88    | 71        | 72        | 49  | 140  | 107     | 27                              | Normal to Mild              | Oxygen and Redox                    | 3.5                              | Oxycline followed by anoxic zone | Reduced                               | -210.96                                | 447.63                        | N/A                                                     |                     | N/A                | N/A                           | N/A                                                     | N/A |     |
| 41 | 10/30/2013  | 0    | 5   | 1  | 0  | 0  | N   | Y  | Y       | N                   |                        | 95                    | 0          | 1             | 0         |        | 0            | 0              |                            |      | 50    | 27        | 50        | 7   | 291  | 105     | 57                              | Severe                      | Oxygen, Redox, pH                   | 11                               | Oxycline followed by anoxic zone | Oxidized                              | 16.52                                  | 376.57                        | N/A                                                     |                     | 8.18               | 7.01                          | N/A                                                     | N/A |     |
| 41 | 12/16/2013  | 0    |     | 0  | 1  | 0  | Y   | N  | N       | Y                   | 2                      | 94                    | 0          | 1             | 0         |        | 0            | 0              | yeast                      |      | 37    | 18        | 44        | 4   |      |         |                                 | Severe                      | Oxygen and Redox                    | 19                               | Oxycline followed by anoxic zone |                                       |                                        |                               | N/A                                                     |                     |                    | N/A                           | N/A                                                     |     |     |
| 41 | 4/28/2014   | 0    | 8   | 0  | 0  | 1  | Y   | Y  | N       | Y                   | 2                      | 96                    | 0          | 1             | 0         | 0      | 0            | 0              |                            |      | 30    | 18        | 53        | 5   | 435  | 121     | 74                              | Severe                      | Oxygen, Redox, H <sub>2</sub> S     | 9.25                             | Oxycline followed by anoxic zone | Reduced                               | -267.13                                | 573.00                        | No                                                      | 0.00                | N/A                | N/A                           | N/A                                                     | N/A |     |
| 41 | 4/30/2014   | 0    |     | 0  | 0  | 1  | Y   | Y  | N       | Y                   | 3                      | 96                    |            |               |           |        |              |                |                            |      | 30    | 18        | 53        | 5   | 435  | 121     | 74                              | Severe                      | Oxygen, Redox, H <sub>2</sub> S     |                                  | Oxycline followed by anoxic zone | Oxidized                              | 163.20                                 | 613.03                        | No                                                      | 0.00                |                    |                               | N/A                                                     | N/A |     |
| 41 | 8/4/2014    | 0    | -   | 1  | 0  | 0  | N   | N  | N       | Y                   | 1.5                    | 99                    | 0          | 1             | 0         |        | 0            | 0              |                            |      | 34    | 20        | 53        | 6   | 246  | 83      | 61                              | Severe                      | Oxygen, Redox, H <sub>2</sub> S     | 6.5                              | Oxycline followed by anoxic zone | Oxidized                              | 221.28                                 | 384.30                        | No                                                      | 0.00                | N/A                | N/A                           | N/A                                                     | N/A |     |
| 42 | 4/14/2014   | 0    |     | 1  | 0  | 0  | N   |    |         | N                   |                        | 100                   | -          | -             | -         | -      | -            | -              |                            |      | 112   | 103       | 82        | 83  | 151  | 117     | 27                              | Normal to Mild              | H <sub>2</sub> S only               | 14                               | N/A                              |                                       | N/A                                    | N/A                           | No                                                      | 0.00                | N/A                | N/A                           | N/A                                                     | N/A |     |
| 45 | 10/1/2014   | 0    | -   | 1  | 0  | 0  | N   | 0  | 0       | 0                   |                        | 98                    | 0          | 1             | 1         | 0      | 0            | 0              |                            |      | 123   | 114       | 80        | 103 | 68   | 127     | 11                              | Normal to Mild              | Oxygen, Redox, H <sub>2</sub> S     | 2.65                             | Oxycline followed by anoxic zone | Oxidized                              | 183.28                                 | 233.21                        | No                                                      | 0.00                | N/A                | N/A                           | N/A                                                     | N/A | N/A |
