# Supplementary material for: Pediatric Cystic Fibrosis Sputum Can Be Chemically Dynamic, Anoxic, and Extremely Reduced Due to Hydrogen Sulfide Formation
Source: PubMed Central journal article supplement — mBio. 2015 Jul 28;6(4):e00767-15. doi: 10.1128/mBio.00767-15 (PMC4551978; doi:10.1128/mbio.00767-15), 2015-07-28
Supplement: mbo004152404st2.pdf [file mbo004152404st2.pdf]

| <b>Subject</b> | <b>Collection Date</b> | <b>pH Maximum</b> | <b>pH Minimum</b> | <b>Presence of H<sub>2</sub>S?</b> |
|----------------|------------------------|-------------------|-------------------|------------------------------------|
| 9              | 5/12/2014              | 5.96294451        | 4.29916668        | Yes                                |
| 10             | 8/6/2014               | 4.66646433        | 2.90646291        | Yes                                |
| 22             | 7/28/2014              | 6.38737679        | 5.37757301        | Yes                                |
| 31             | 10/28/2013             | 6.83595324        | 5.352965355       | Not Measured                       |
| 32             | 7/30/2014              | 6.51340723        | 5.433486938       | Yes                                |
| 34             | 7/31/2013              | 9.094651222       | 8.423373222       | Not Measured                       |
| 36             | 6/18/2014              | 6.232840538       | 3.276566505       | Yes                                |
| 41             | 10/30/2013             | 8.181546211       | 7.005856991       | Not Measured                       |
