# Supplementary material for: Pediatric Cystic Fibrosis Sputum Can Be Chemically Dynamic, Anoxic, and Extremely Reduced Due to Hydrogen Sulfide Formation
Source: PubMed Central journal article supplement — mBio. 2015 Jul 28;6(4):e00767-15. doi: 10.1128/mBio.00767-15 (PMC4551978; doi:10.1128/mbio.00767-15), 2015-07-28
Supplement: mbo004152404st3.pdf [file mbo004152404st3.pdf]

| Subject Number         | Collection Date | Cl <sup>-</sup>     | NO <sub>3</sub> <sup>-</sup> | SO <sub>4</sub> <sup>-2</sup> | Na <sup>+</sup>     | NH <sub>4</sub> <sup>+</sup> | K <sup>+</sup>     | Mg <sup>+2</sup>   | Ca <sup>+2</sup>   | Reduction Potential Class (Reduced or Oxidized) | Presence of H <sub>2</sub> S? |
|------------------------|-----------------|---------------------|------------------------------|-------------------------------|---------------------|------------------------------|--------------------|--------------------|--------------------|-------------------------------------------------|-------------------------------|
| 2                      | 8/6/2014        | 14.72 ± 2.76        | 0.00 ± 0.00                  | 0.31 ± 0.19                   | 17.47 ± 2.91        | 0.69 ± 0.80                  | 4.63 ± 0.64        | 0.18 ± 0.03        | 2.30 ± 0.17        | Oxidized                                        | No                            |
| 6                      | 8/13/2014       | 20.87 ± 0.74        | 1.01 ± 0.01                  | 0.47 ± 0.02                   | 32.68 ± 1.02        | 5.19 ± 0.66                  | 9.83 ± 0.39        | 0.68 ± 0.04        | 1.62 ± 0.20        | Oxidized                                        | No                            |
| 9                      | 5/12/2014       | 6.92 ± 0.91         | 0.07 ± 0.05                  | 0.07 ± 0.07                   | 12.63 ± 0.65        | 5.27 ± 0.24                  | 3.47 ± 0.24        | 0.40 ± 0.17        | 0.63 ± 0.30        | Reduced                                         | Yes                           |
| 10                     | 7/21/2014       | 29.02 ± 0.51        | 0.53 ± 0.93                  | 0.48 ± 0.02                   | 32.23 ± 0.55        | 5.20 ± 0.08                  | 11.58 ± 0.04       | 0.55 ± 0.00        | 1.25 ± 0.06        | Oxidized                                        | No                            |
| 10                     | 5/5/2014        | 36.51 ± 0.54        | 0.60 ± 0.77                  | 0.40 ± 0.04                   | 40.56 ± 0.78        | 7.30 ± 0.09                  | 14.29 ± 0.27       | 0.67 ± 0.02        | 2.19 ± 0.79        | Oxidized                                        | No                            |
| 10                     | 8/6/2014        | 17.32 ± 2.20        | 0.26 ± 0.65                  | 0.30 ± 0.07                   | 20.53 ± 1.84        | 7.55 ± 0.64                  | 7.89 ± 0.08        | 0.47 ± 0.04        | 1.40 ± 0.13        | Reduced                                         | Yes                           |
| 10                     | 9/17/2014       | 35.19 ± 0.30        | 0.74 ± 0.64                  | 0.33 ± 0.04                   | 38.34 ± 0.36        | 5.67 ± 0.22                  | 9.70 ± 0.61        | 0.29 ± 0.03        | 1.15 ± 0.09        | Oxidized                                        | No                            |
| 19                     | 4/21/2014       | 18.17 ± 1.17        | 0.12 ± 0.03                  | 0.21 ± 0.02                   | 29.72 ± 1.84        | 5.09 ± 0.17                  | 5.65 ± 0.30        | 1.08 ± 0.06        | 1.76 ± 0.06        | Oxidized                                        | No                            |
| 19                     | 9/10/2014       | 12.41 ± 0.70        | 1.09 ± 0.01                  | 0.11 ± 0.02                   | 19.09 ± 1.14        | 2.45 ± 0.09                  | 3.25 ± 0.16        | 0.24 ± 0.03        | 0.60 ± 0.14        | Oxidized                                        | No                            |
| 22                     | 7/28/2014       | 10.40 ± 0.32        | 0.00 ± 0.00                  | 0.44 ± 0.02                   | 14.95 ± 0.42        | 8.66 ± 0.96                  | 5.47 ± 0.34        | 0.53 ± 0.04        | 1.10 ± 0.10        | Reduced                                         | Yes                           |
| 29                     | 6/16/2014       | 29.67 ± 0.83        | 0.73 ± 0.09                  | 0.85 ± 0.12                   | 50.23 ± 1.36        | 6.37 ± 1.44                  | 11.05 ± 0.42       | 1.28 ± 0.20        | 1.25 ± 0.35        | Oxidized                                        | No                            |
| 30                     | 2/17/2014       | 79.95 ± 2.57        | 0.22 ± 0.10                  | 0.72 ± 0.15                   | 73.19 ± 2.55        | 10.33 ± 0.36                 | 24.10 ± 0.88       | 0.70 ± 0.04        | 1.80 ± 0.26        | Reduced                                         | No                            |
| 30                     | 8/11/2014       | 19.11 ± 1.07        | 0.37 ± 0.64                  | 0.18 ± 0.05                   | 22.05 ± 0.86        | 4.58 ± 0.57                  | 7.60 ± 0.38        | 0.11 ± 0.03        | 0.67 ± 0.07        | Oxidized                                        | Yes                           |
| 32                     | 7/30/2014       | 3.48 ± 0.23         | 0.00 ± 0.00                  | 0.07 ± 0.01                   | 7.23 ± 0.17         | 1.96 ± 0.03                  | 0.65 ± 0.01        | 0.31 ± 0.00        | 0.97 ± 0.20        | Reduced                                         | Yes                           |
| 36                     | 3/12/2014       | 17.44 ± 0.48        | 0.09 ± 0.12                  | 0.13 ± 0.06                   | 22.15 ± 0.20        | 3.94 ± 0.17                  | 3.60 ± 0.11        | 0.30 ± 0.15        | 1.14 ± 0.61        | Not measured                                    | No                            |
| 36                     | 6/18/2014       | 20.86 ± 9.59        | 0.20 ± 0.46                  | 0.32 ± 0.15                   | 23.77 ± 9.07        | 3.73 ± 1.05                  | 6.04 ± 1.68        | 0.23 ± 0.14        | 0.85 ± 0.45        | Reduced                                         | Yes                           |
| 36                     | 7/21/2014       | 19.82 ± 0.21        | 1.58 ± 0.03                  | 0.08 ± 0.03                   | 19.53 ± 0.24        | 3.01 ± 0.04                  | 5.63 ± 0.08        | 0.39 ± 0.04        | 1.45 ± 0.04        | Reduced                                         | No                            |
| 41                     | 4/28/2014       | 20.94 ± 0.49        | 0.50 ± 0.50                  | 0.36 ± 0.04                   | 23.95 ± 0.43        | 4.05 ± 0.17                  | 7.50 ± 0.32        | 0.45 ± 0.15        | 1.81 ± 0.71        | Reduced                                         | No                            |
| 41                     | 4/30/2014       | 20.87 ± 1.12        | 0.37 ± 0.49                  | 0.08 ± 0.03                   | 22.25 ± 1.28        | 3.55 ± 0.15                  | 11.33 ± 0.41       | 0.51 ± 0.17        | 1.13 ± 0.24        | Oxidized                                        | No                            |
| 41                     | 8/4/2014        | 6.98 ± 0.18         | 1.50 ± 0.02                  | 0.22 ± 0.04                   | 9.63 ± 0.17         | 2.03 ± 1.13                  | 2.64 ± 0.18        | 0.35 ± 0.02        | 1.97 ± 0.31        | Oxidized                                        | No                            |
| <b>Overall Average</b> |                 | <b>23.63 ± 2.03</b> | <b>0.51 ± 0.31</b>           | <b>0.40 ± 0.11</b>            | <b>29.86 ± 1.93</b> | <b>5.50 ± 0.42</b>           | <b>9.19 ± 0.37</b> | <b>0.66 ± 0.06</b> | <b>1.41 ± 0.22</b> |                                                 |                               |
