# Supplementary figures and images for: Pediatric Cystic Fibrosis Sputum Can Be Chemically Dynamic, Anoxic, and Extremely Reduced Due to Hydrogen Sulfide Formation
Source: PubMed Central journal article supplement — mBio. 2015 Jul 28;6(4):e00767-15. doi: 10.1128/mBio.00767-15 (PMC4551978; doi:10.1128/mbio.00767-15), 2015-07-28

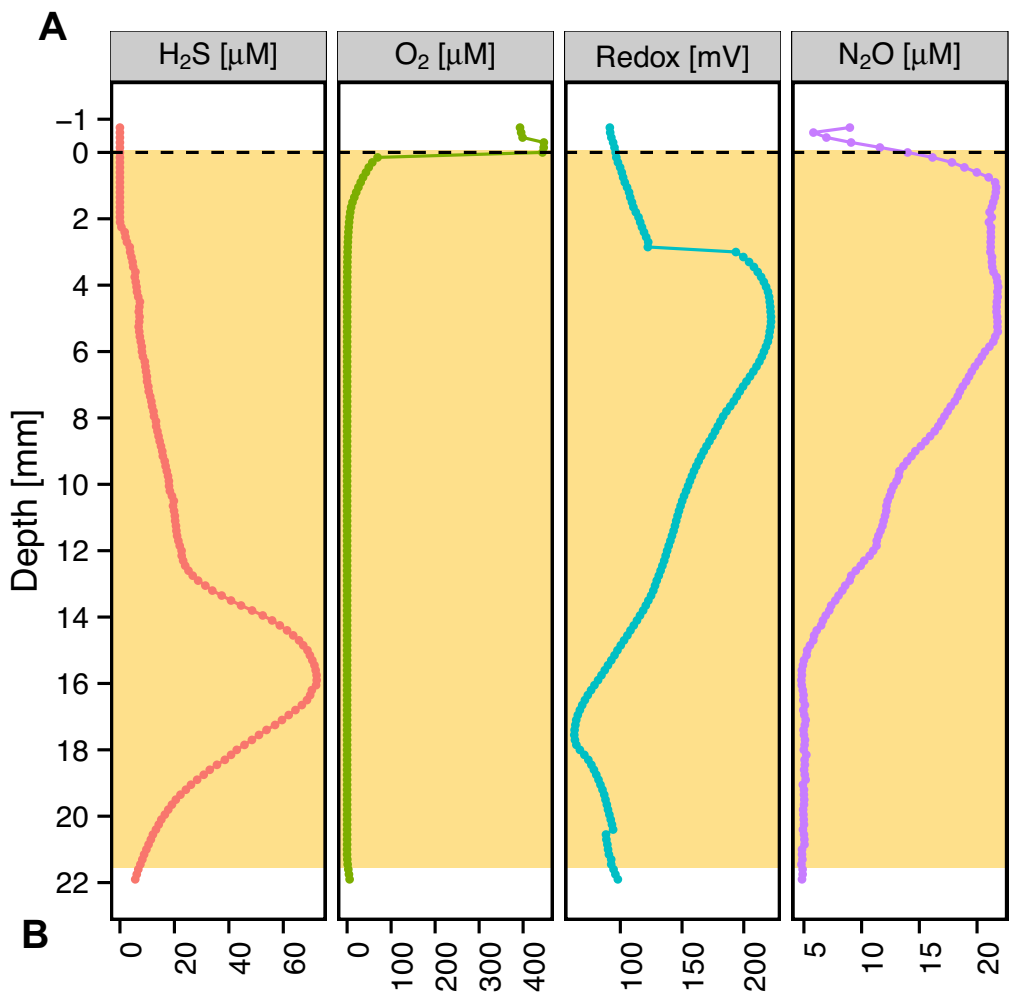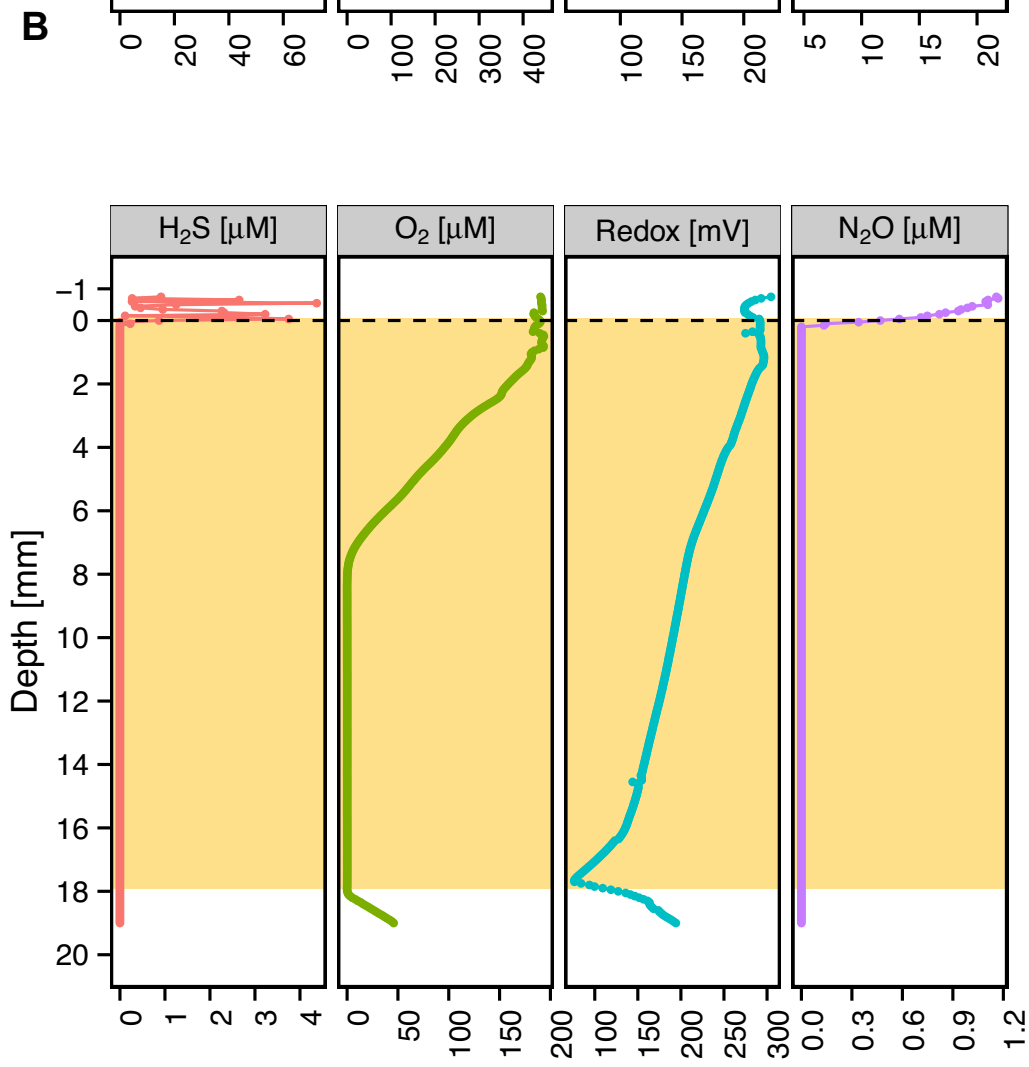

Supplement: mbo004152404sf2.pdf [file mbo004152404sf2.pdf]

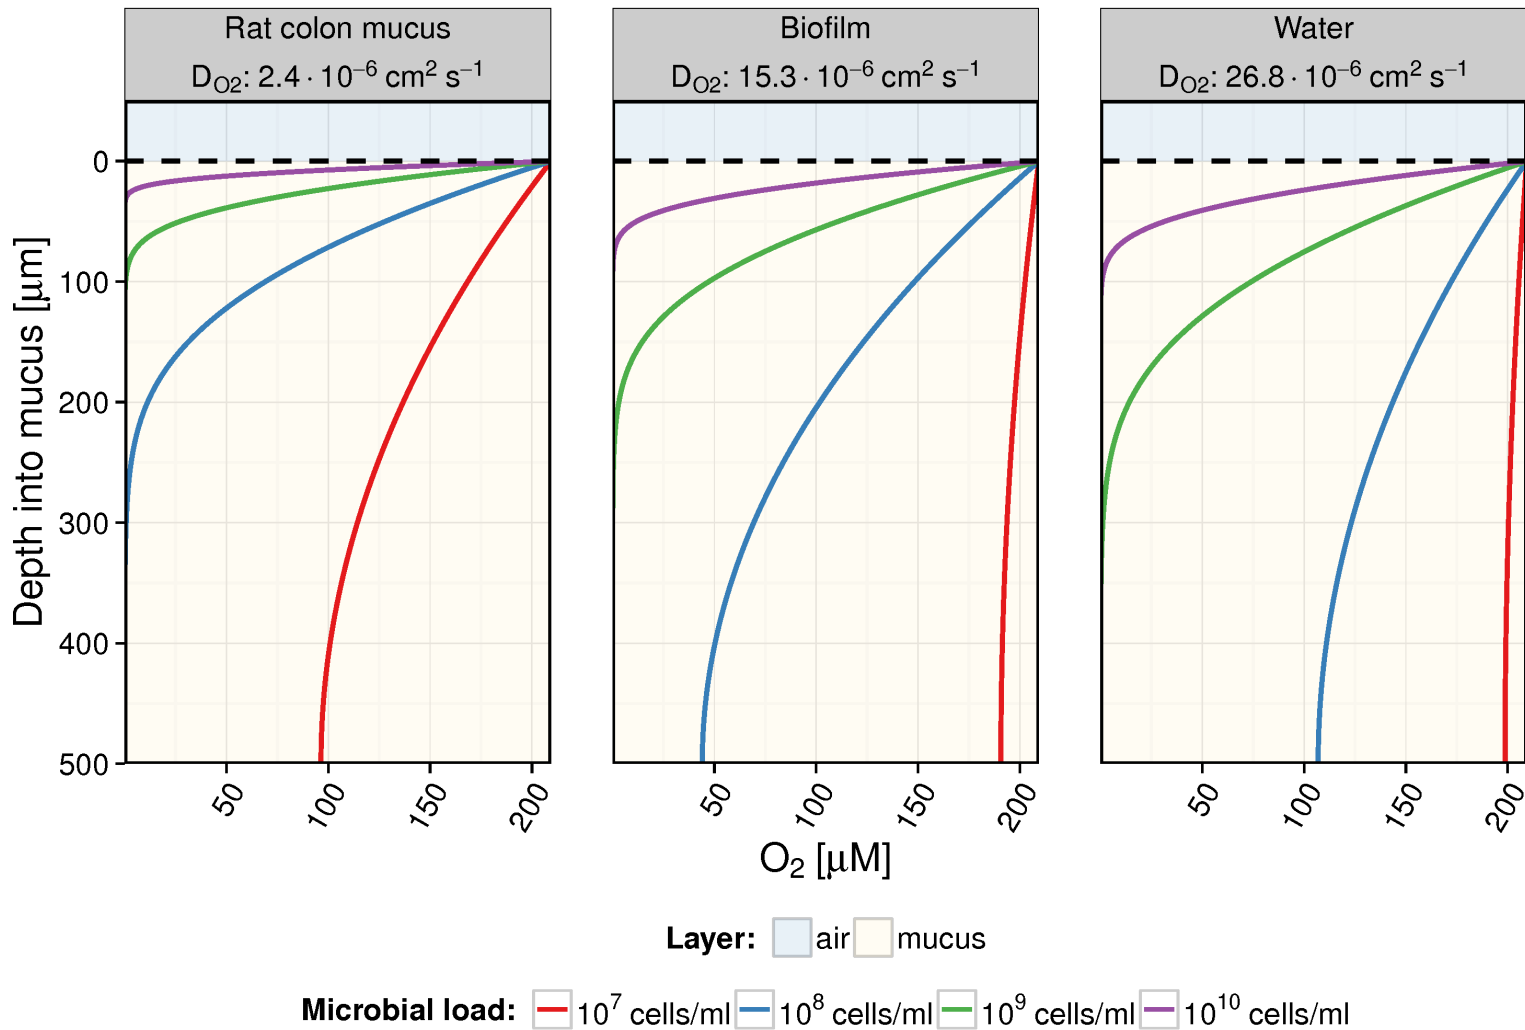

Supplement: mbo004152404sf3.pdf [file mbo004152404sf3.pdf]
